# Supplementary material
Source: PubMed Central journal article supplement (PMC4142478)
Supplement: NIHMS621212-supplement-supplemental_data.pdf [file NIHMS621212-supplement-supplemental_data.pdf]

Supplemental Figure 1:  Naive  rAd5-Null  rAd5-EAT2

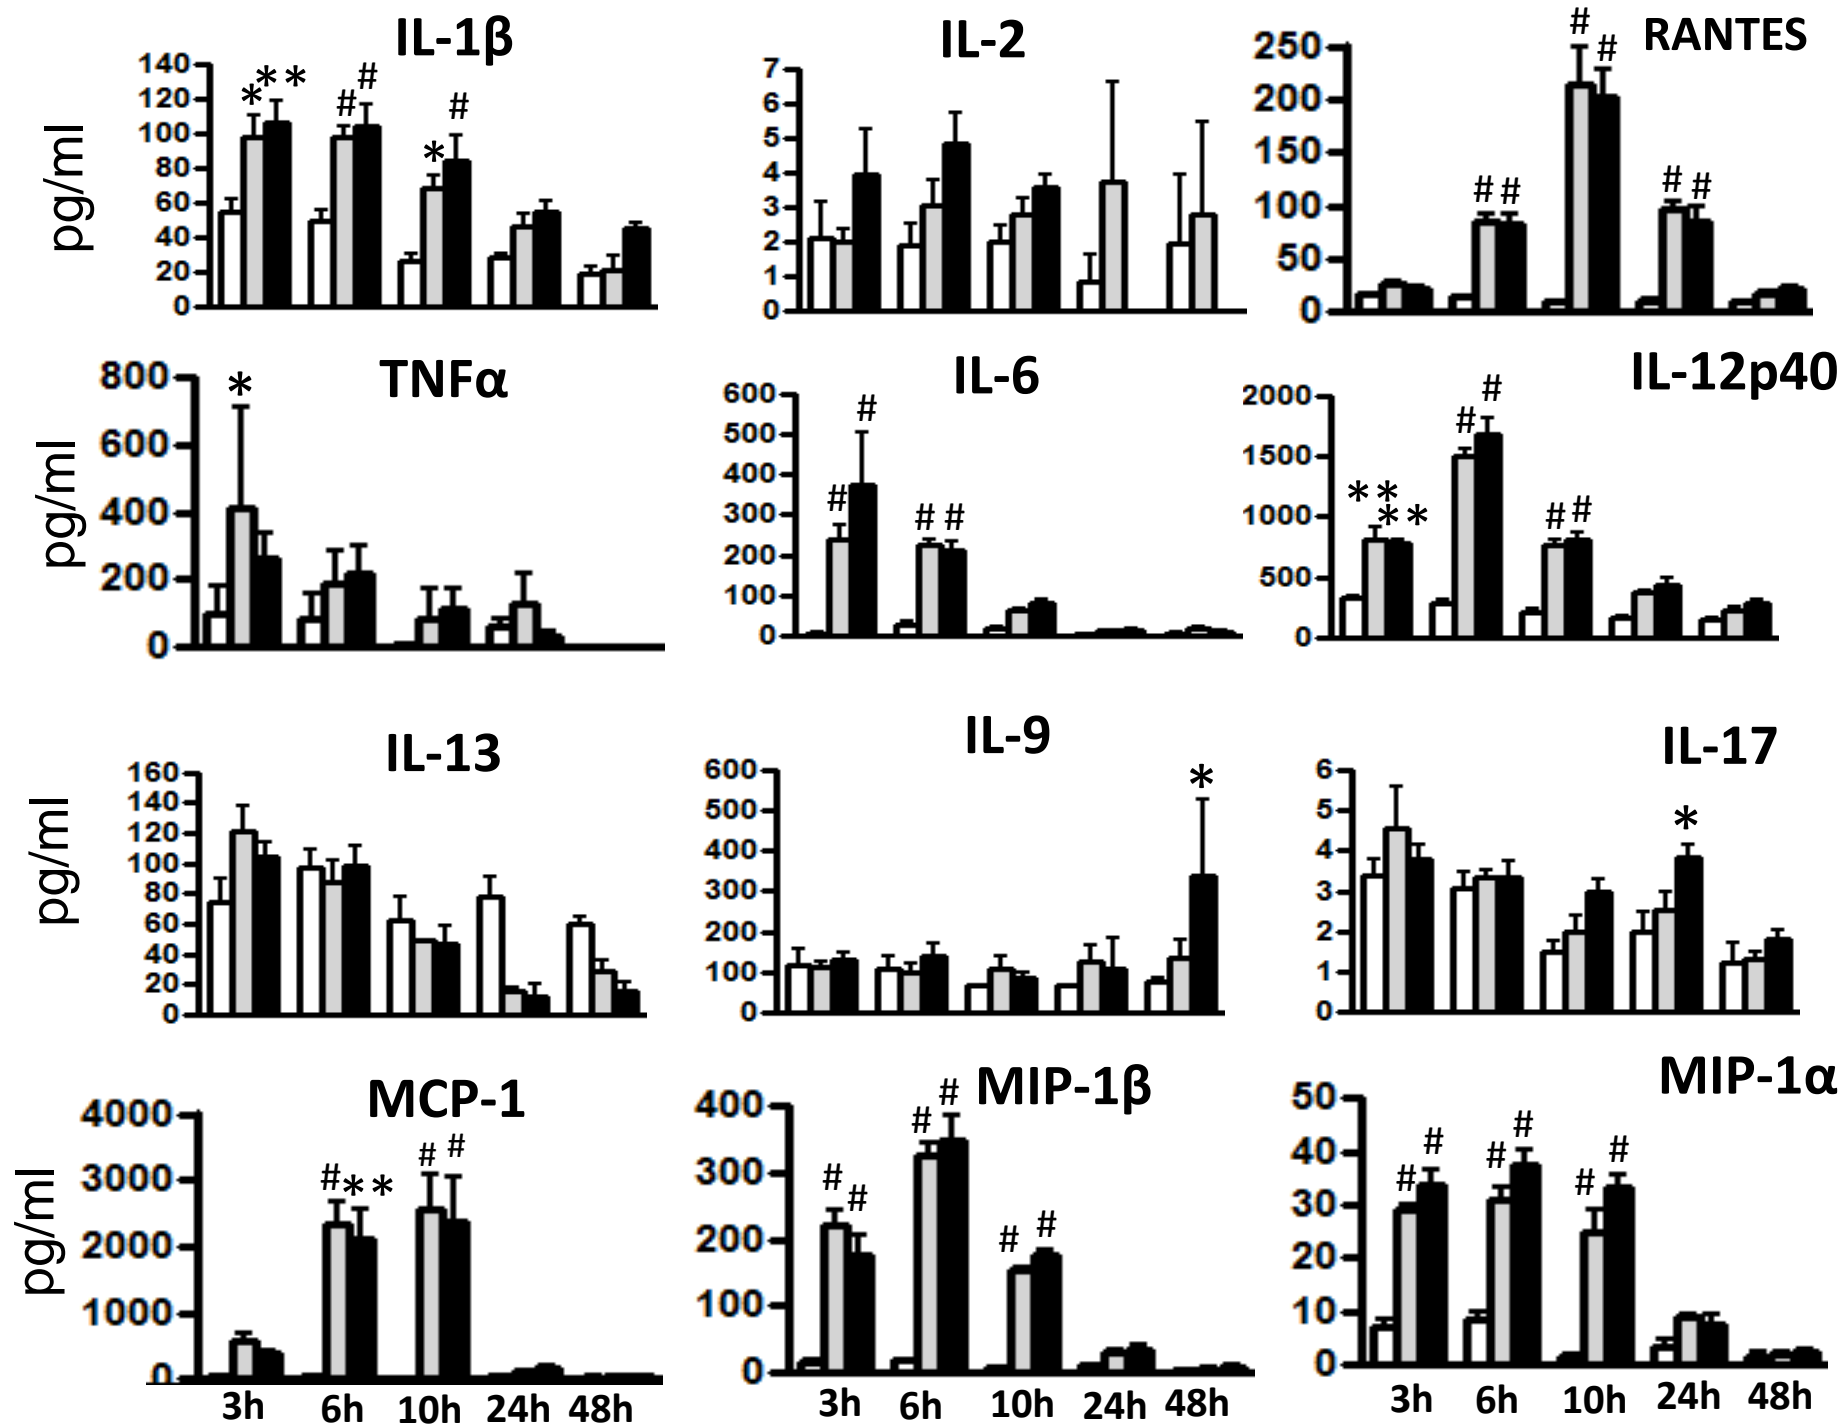

# Supplemental Figure: 2

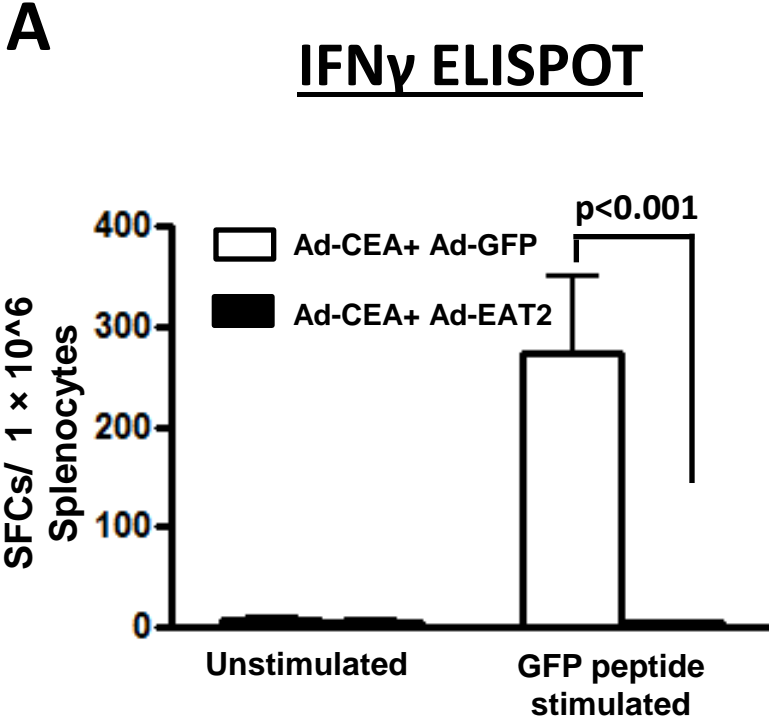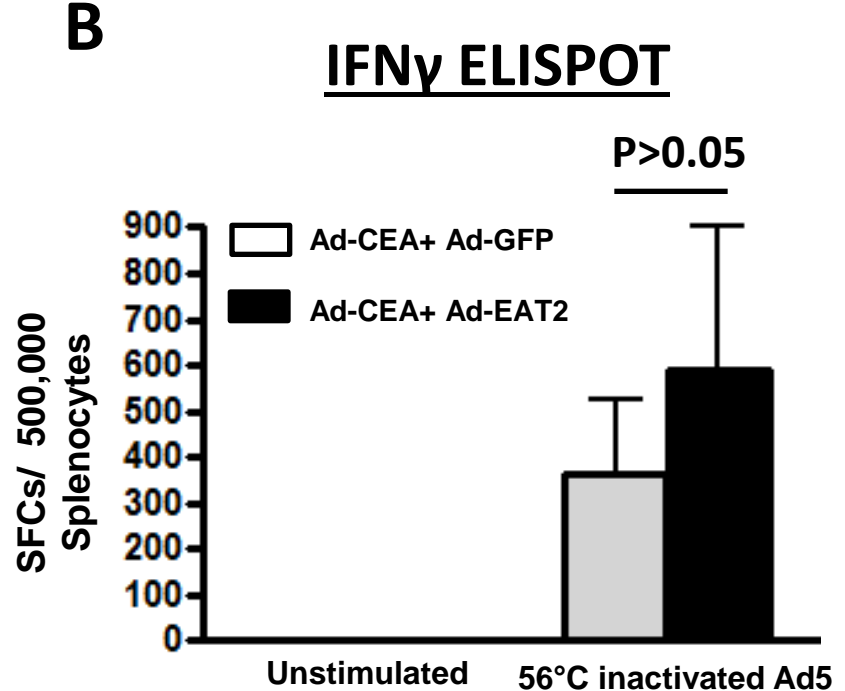

# Supplemental Figure 3:

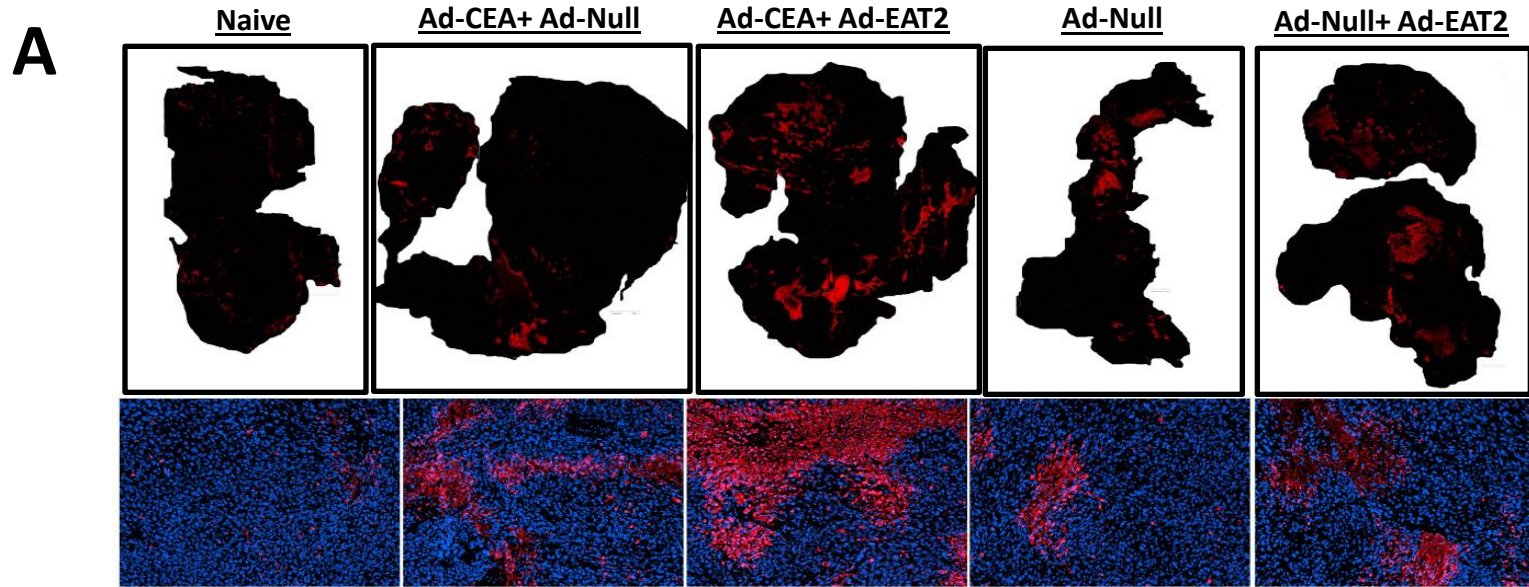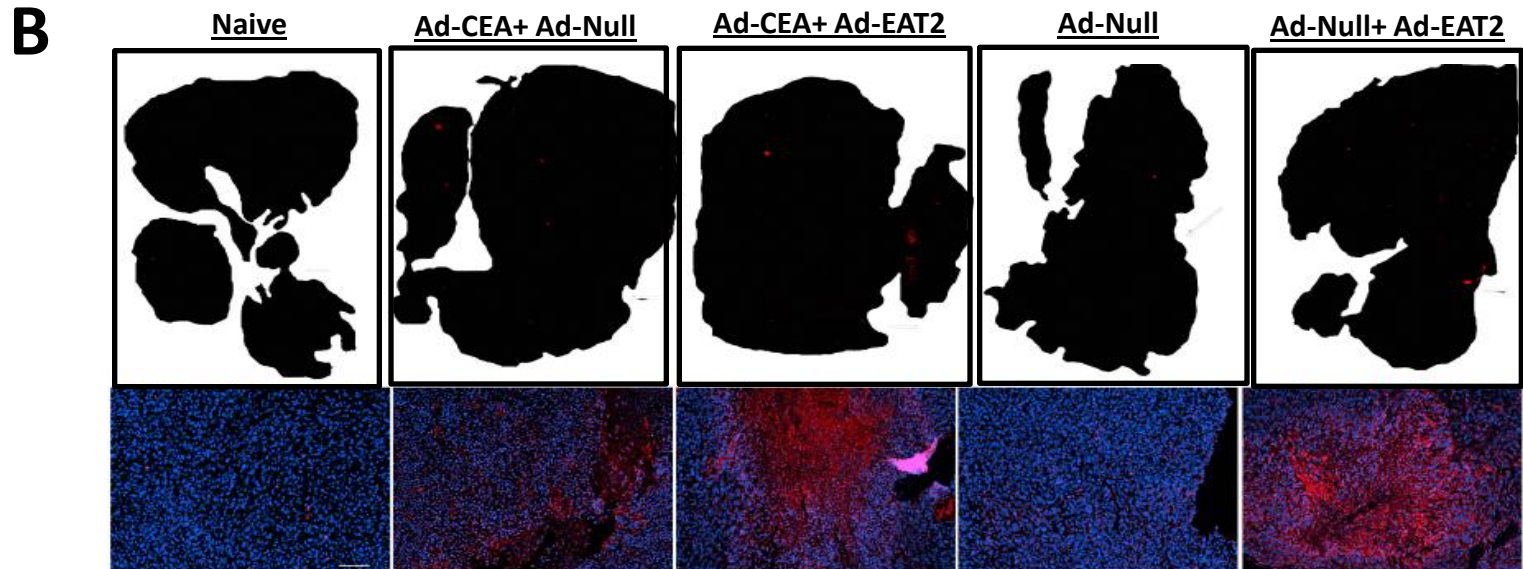

**Supplemental Figure 1: Kinetics of pro-inflammatory cytokine and chemokine production following rAd5-EAT2 administration.** WT C57BL/6 mice (n=8) were either mock injected, or intravenously injected with  $7.5 \times 10^{10}$  vps of either rAd5-EAT2 or rAd5-Null control vectors. Plasma was harvested at 3, 6, 10, 24, and 48h after virus injection. Cytokine induction was evaluated using a 23-plex multiplexed bead array based quantitative system. The bars represent mean  $\pm$  SD. Statistical analysis was completed using a Two Way ANOVA with a Student-Newman-Keuls post-hoc test,  $p < 0.05$  was deemed a statistically significant difference. \*, denotes  $p < 0.05$ , \*\* denotes  $p < 0.01$ , # denotes  $p < 0.001$ , statistically significant different from mock injected animals.

**Supplemental Figure 2: Vaccine elicited GFP and Ad5-specific T cell immune responses.** WT C57BL/6 mice (n=4) were co-immunized intramuscularly in the tibialis anterior with equivalent viral particles of rAd5-CEA mixed with either rAd5-GFP or rAd5-EAT2 (total of  $1 \times 10^9$  vps mixed prior to injection). At 14 dpi, splenocytes were harvested and stimulated *ex vivo* with the GFP-specific peptide (a) or heat (55°C) inactivated Ads (b), followed by IFN $\gamma$  ELISPOT, performed as described in Materials and Methods. Spot forming cells (SFCs) were quantified using an ELISPOT reader. Data are presented as mean  $\pm$  SD. Statistical analysis was completed using One-Way ANOVA with a Bonferroni post-hoc test,  $p < 0.05$  was deemed a statistically significant difference.

**Supplemental Figure 3: Tumor tissues derived from rAd5-EAT2 and rAd5-EAT2 co-vaccinated mice have increased caspase-3 activation and granzyme B expression.**

Immunohistochemistry for active Caspase-3 (a) and granzyme B (b) (red) was performed on

tumor tissues (whole tumor section (top) or 10 X magnifications (bottom)) derived from rAd5-CEA+ rAd5-EAT2 co-injected animals at the end of the study (18 dpi). Tumor tissues derived from rAd5-EAT2 co-injected mice show a strong signal for active caspase-3 and granzyme B.

**Supplemental Table #1:**

| <b>Cytokine/Chemokine</b> | <b>Lower detection limit (pg/ml)</b> |
|---------------------------|--------------------------------------|
| IL-1 $\alpha$             | 1.44                                 |
| IL-1 $\beta$              | 3.61                                 |
| IL-2                      | 3.58                                 |
| IL-3                      | 1.6                                  |
| IL-4                      | 6.53                                 |
| IL-5                      | 2.77                                 |
| IL-6                      | 1.1                                  |
| IL-9                      | 4.3                                  |
| IL-10                     | 3.75                                 |
| IL-12(p40)                | 1.1                                  |
| IL-12(p70)                | 5.44                                 |
| IL-13                     | 5.45                                 |
| IL-17                     | 2.03                                 |
| Eotaxin                   | 41.98                                |
| G-CSF                     | 2.32                                 |
| GM-CSF                    | 1.96                                 |
| IFN- $\gamma$             | 1.33                                 |
| KC                        | 3.21                                 |
| MCP-1                     | 4.88                                 |
| MIP-1 $\alpha$            | 2.45                                 |
| MIP-1 $\beta$             | 1.3                                  |
| RANTES                    | 0.7                                  |
| TNF- $\alpha$             | 10.9                                 |

Assay range for the lower and upper detection limit for the 23-

| <b>Upper detection limit (pg/ml)</b> |
|--------------------------------------|
| 27885.71                             |
| 46323.47                             |
| 57140.74                             |
| 20478.46                             |
| 99593.26                             |
| 11780.96                             |
| 13045.58                             |
| 30650.2                              |
| 17348.83                             |
| 20036.45                             |
| 20390.28                             |
| 41923.87                             |
| 30411.16                             |
| 37427.59                             |
| 43675.94                             |
| 2255.34                              |
| 5483.35                              |
| 36304.5                              |
| 11350.52                             |
| 63935.68                             |
| 23066.95                             |
| 3246.71                              |
| 53383.53                             |

plex mouse cytokines and chemokines
